# Supplementary material for: Bimetallic Ru(ii) and Os(ii) complexes based on a pyrene-bisimidazole spacer: synthesis, photophysics, electrochemistry and multisignalling DNA binding studies in the near infrared region
Source: Royal Society of Chemistry journal article supplement (doi:10.1039/c7dt03355a), 2017-01-01
Supplement: c7dt03355a1.pdf [file c7dt03355a1.pdf]

## **Electronic supplementary information**

### **Bimetallic Ru(II) and Os(II) complexes based on pyrene-bisimidazole spacer: synthesis, photophysics, electrochemistry and multisignalling DNA binding studies in the near infrared region**

**Sourav Mardanya, Debiprasad Mondal, and Sujoy Baitalik\***

Department of Chemistry, Inorganic Chemistry Section, Jadavpur University, Kolkata –  
700032, India

## Physical measurements

Elemental analyses of the compounds were performed with a Vario-Micro V2.0.11 elemental (CHNSO) analyzer. NMR spectra were collected on Bruker 500 spectrometer in DMSO-*d*<sub>6</sub>, and high resolution mass spectroscopy was performed on a Waters Xevo G2 QTOF mass spectrometer. The UV/vis absorption spectra were recorded with a Shimadzu UV 1800 spectrometer. A matched pair of quartz cuvettes (path length 1 cm) was employed. Steady state luminescence spectra were obtained either by a Perkin–Elmer LS55 or Spex fluorolog-2 spectrofluorometer equipped with DM3000F software. Luminescence quantum yields were determined by using literature method taking [Ru(bpy)<sub>3</sub>]<sup>2+</sup> as the standard. Luminescence lifetime measurements were carried out by using time–correlated single photon counting set up from Horiba Jobin-Yvon. The luminescence decay data were collected on a Hamamatsu MCP photomultiplier (R3809) and were analyzed by using IBH DAS6 software. Cyclic and square-wave voltammetric experiments were performed in deaerated acetonitrile with a BAS epsilon electrochemistry system and a three-electrode set up consisting of a platinum or glassy carbon working electrode, a platinum counter electrode, and Ag/AgCl reference electrode. Tetraethylammonium perchlorate (TEAP) was used as background electrolyte. The potentials reported in this study were referenced against the Ag/AgCl electrode, which under the given experimental conditions gave a value of 0.36 V for the Fc/Fc<sup>+</sup> couple. Spectroelectrochemical measurements were performed with a system consisting of a BAS epsilon potentiostat/galvanostat, a Shimadzu 3600 UV-VIS-NIR spectrophotometer and an optically transparent spectroelectrochemical cell specially designed by BAS.

## X-ray crystallographic analyses

The crystallographic data, details of data collection, and refinement parameter for the complex **1** are summarized in Table S1. Single crystal of suitable size was obtained by diffusing toluene to 1:1 acetonitrile-dichloromethane solution of the complex. The crystal was immersed in paratone oil and then mounted on the tip of a glass fibre and cemented using epoxy resin. Intensity data for the crystal was collected using MoK $\alpha$  ( $\lambda = 0.7107 \text{ \AA}$ ) radiation on a Bruker SMART APEX II diffractometer equipped with CCD area detector at room temperature. The data integration and reduction were processed with SAINT<sup>S1</sup> software provided with the software package of SMART APEX II. An empirical absorption correction was applied to the collected reflections with SADABS.<sup>S1</sup> The structure was solved by direct methods using SHELXTL<sup>S2</sup> and was refined on F<sup>2</sup> by the full-matrix least-squares technique

using the SHELXL-97<sup>S3</sup> program package. Graphics was generated using PLATON.<sup>S4</sup> Non-hydrogen atoms were refined anisotropically until the convergence. All the hydrogen atoms were geometrically positioned and treated as riding atoms.

### Theoretical computational methods

Quantum chemical calculations were performed with the Gaussian 09 program<sup>S5</sup> employing the DFT method with Becke's three-parameter hybrid functional and Lee-Yang-Parr's gradient corrected correlation functional B3LYP level of theory.<sup>S6,S7</sup> The 6-31G(d) basis set was employed for the C, H and N while SDD basis set was used for Ru and Os atoms.<sup>[S8]</sup> Geometries were fully optimized using the criteria of the respective programs. Time-dependent DFT (TD-DFT) calculations were performed to assign the experimentally observed bands in the complexes.<sup>S9-S12</sup> The excitation energies, computed within the acetonitrile solvent simulated by the CPCM model,<sup>S13</sup> has been determined by using the so-called nonequilibrium approach, which has been designed for the study of the absorption process.<sup>S14,S15</sup> Only singlet-singlet transitions, that is, the spin-allowed transitions, have been taken into account. UKS calculations were also performed to calculate singlet-triplet energy gap in CH<sub>3</sub>CN using the CPCM model. Orbital analysis was completed with Gauss View<sup>S16</sup> and Gauss sum 2.2.<sup>S17</sup>

### DNA binding experiments

#### Absorption and emission spectral experiments

UV-vis absorption and emission titrations were carried out by maintaining a constant metal complex concentration (20 μM) and adding incrementally the CT-DNA solution of appropriate concentration in 5 mM Tris-HCl/NaCl buffer with the ionic strength of 50 .0 × 10<sup>-3</sup> m (pH 7.30) at room temperature. After each addition of DNA to the solution of the metal complexes, the resulting solution was allowed to equilibrate at 25 °C for 5 min, after which the absorption and emission readings were noted. Proper corrections were made to the absorbance of CT-DNA. The equilibrium binding constant (K<sub>b</sub>) and the binding site size (s, per base pair) of the complexes to CT-DNA were calculated by non-linear least square analysis of the isotherm using the expression of Bard and co-workers based on the McGhee-von Hippel (MvH) model.<sup>S18-S19</sup>

$$(\epsilon_a - \epsilon_f)/(\epsilon_b - \epsilon_f) = (b - (b^2 - 2K_b^2C_t[\text{DNA}]/s)^{1/2})/2K_bC_t \quad (\text{S1})$$

$$(I_a - I_f)/(I_b - I_f) = (b - (b^2 - 2K_b^2C_t[\text{DNA}]/s)^{1/2})/2K_bC_t \quad (\text{S2})$$

where  $b = 1 + K_b C_t + K_b [\text{DNA}]/2s$ ,  $\epsilon_a$  is the extinction coefficient observed for the spectral band at a given DNA concentration,  $\epsilon_f$  is the extinction coefficient of the free complex in solution,  $\epsilon_b$  is the extinction coefficient of the complex when fully bound to DNA. Similarly  $I_a$ ,  $I_f$  and  $I_b$  are the luminescence intensities of the complex at a given DNA concentration, free complex and fully bound to DNA respectively.  $K_b$  is the equilibrium binding constant,  $C_t$  is the total complex concentration,  $[\text{DNA}]$  is the DNA concentration in nucleotides and  $s$  is the binding site size of the complexes in base pairs. The non-linear least-square fit analysis was done using Origin Lab software. The lifetimes of the complexes were also recorded as a function of CT-DNA in 5 mM Tris-HCl/ NaCl buffer with the ionic strength of  $50.0 \times 10^{-3}$  M (pH 7.30) at room temperature.

### Competitive binding fluorescence experiments

The apparent binding constants ( $K_{app}$ ) of the complexes have been evaluated by using ethidium bromide (EB)-bound CT-DNA solution in 5 mM Tris-HCl/ NaCl buffer with the ionic strength of  $50.0 \times 10^{-3}$  M (pH 7.30) at room temperature. The luminescence intensities at 602 nm (546 nm excitation) of EB-DNA conjugate with increasing concentration of **1** and **2** were recorded. The  $K_{app}$  values were calculated by using the equation  $K_{EB} \times [\text{EB}] = K_{app} \times [\text{complex}]$ , where  $K_{EB}$  is the binding constant of EB ( $K_{EB} = 1.25 \times 10^6 \text{ M}^{-1}$ ),  $[\text{EB}]$  is the concentration of EB (13  $\mu\text{M}$ ) and  $[\text{complex}]$  is the concentration of the complex at 50% reduction of the initial fluorescence emission intensity.<sup>S20</sup>

### Circular dichroism experiments

The Circular dichroism (CD) spectroscopy was studied on a JASCO J-815 CD spectropolarimeter between 400 and 200 nm in continuous scanning mode at 25°C. Experiments were performed by adding progressively increasing amounts of complexes to the solutions of CT-DNA [40 $\mu\text{M}$ ] in 5 mM Tris-HCl/ NaCl buffer with the ionic strength of  $50.0 \times 10^{-3}$  M (pH 7.30).

### Thermal denaturation experiments

The effect of temperature on CT-DNA in absence and presence of the complexes were measured from circular dichroism study. The experiments were performed on a JASCO J-815 CD spectropolarimeter equipped with a Peltier temperature-controller (JASCO-PTC-423S/15). CD melting profiles were generated by rising temperature from 40 to 110°C with

monitoring the absorbance at 260nm in 5 mM Tris-HCl/ NaCl buffer with the ionic strength of  $50.0 \times 10^{-3}$  M (pH 7.30) medium. The melting temperature  $T_m$  was taken as the midpoint of the melting curve which was obtained from the maximum of the first derivative plot and checked graphically by tangent method.  $\Delta T_m$  value was calculated by subtracting  $T_m$  of the free nucleic acid from that of the complex.<sup>S21</sup>

### **Molecular docking studies**

Molecular docking studies were performed using HEX 8.0 software.<sup>S22</sup> To perform such studies, crystal structure of B-DNA (PDB ID: 1BNA) and DFT optimized structures (using Gaussian 09 software) of the complexes were used. The crystal structure of B-DNA was retrieved from the protein data bank (<http://www.rcsb.org./pdb>). To obtain the molecular docked structures and to elucidate different type of interaction processes between DNA and the receptors Biovia Discovery Studio 2016 software was used.

### **Viscometric study**

The viscosity of sonicated DNA<sup>S23</sup> was measured by a fabricated micro viscometer, maintained at  $28 (\pm 0.5)$  °C in a thermostatic water bath. Then the viscosities of CT-DNA-EB, CT-DNA-Complex **1** and CTDNA-Complex **2** conjugates were measured in the same experimental conditions. Data were presented as  $(\eta/\eta_0)^{1/3}$  versus the ratio of the concentration of either EB or complex **1** or **2** to that of the CT DNA, where  $\eta_0$  is the viscosity of CT DNA solution alone and  $\eta$  is the viscosity of CT DNA solution in the presence of either the complexes or EB. Viscosity values were calculated from the observed flow time of CT DNA by the relation  $\eta = t - t_0$ , where  $t$  and  $t_0$  are the values of flow times for the solution and the Tris-NaCl buffer respectively.

**Table S1** Crystallographic data for complex **1**

|                                                                                                                                                                                            |                         |
|--------------------------------------------------------------------------------------------------------------------------------------------------------------------------------------------|-------------------------|
| Compound                                                                                                                                                                                   | <b>1</b>                |
| Formula                                                                                                                                                                                    | C75 H56 Cl4 N14 O16 Ru2 |
| fw                                                                                                                                                                                         | 1753.28                 |
| T (K)                                                                                                                                                                                      | 293(2)                  |
| Cryst. Syst.                                                                                                                                                                               | Triclinic               |
| Space group                                                                                                                                                                                | P-1                     |
| <i>a</i> (Å)                                                                                                                                                                               | 12.2111(5)              |
| <i>b</i> (Å)                                                                                                                                                                               | 18.6407(6)              |
| <i>c</i> (Å)                                                                                                                                                                               | 18.8598(8)              |
| $\alpha$ (deg)                                                                                                                                                                             | 75.740(3)               |
| $\beta$ (deg)                                                                                                                                                                              | 77.216(4)               |
| $\gamma$ (deg)                                                                                                                                                                             | 80.547(3)               |
| <i>V</i> (Å <sup>3</sup> )                                                                                                                                                                 | 4030.1(3)               |
| Dc(g cm <sup>-3</sup> )                                                                                                                                                                    | 1.445                   |
| <i>Z</i>                                                                                                                                                                                   | 2                       |
| $\mu$ (mm <sup>-1</sup> )                                                                                                                                                                  | 0.580                   |
| <i>F</i> (000)                                                                                                                                                                             | 1776.0                  |
| $\theta$ range (deg)                                                                                                                                                                       | 1.72-25.00              |
| Data/restraints/params                                                                                                                                                                     | 14064/0/1001            |
| GOF on <i>F</i> <sup>2</sup>                                                                                                                                                               | 1.003                   |
| <i>R</i> <sub>1</sub> [ <i>I</i> > 2σ( <i>I</i> )] <sup>a</sup> ,                                                                                                                          | 0.0656                  |
| <i>wR</i> <sub>2</sub> (all data) <sup>b</sup>                                                                                                                                             | 0.1423                  |
| Δρ <sub>max</sub> /Δρ <sub>min</sub> (e Å <sup>-3</sup> )                                                                                                                                  | 1.846/ -1.533           |
| <sup>a</sup> R1( <i>F</i> ) = [ $\sum    F_0   -  F_C    / \sum   F_0  $ ], <sup>b</sup> wR2 ( <i>F</i> <sup>2</sup> )<br>= [ $\sum w(F_0^2 - F_C^2)^2 / \sum w(F_0^2)^2$ ] <sup>1/2</sup> |                         |

**Table S2** Selected calculated bond distances (Å) for **1** and **2** in ground and UKS optimized state along with available X-ray crystal data

|         | Exp<br><b>1</b> | Soln.<br><b>1</b> | UKS<br><b>1</b> |  |         | Soln.<br><b>2</b> | UKS<br><b>2</b> |
|---------|-----------------|-------------------|-----------------|--|---------|-------------------|-----------------|
| Ru1-N1  | 2.08(5)         | 2.11              | 2.12            |  | Os1-N1  | 2.11              | 2.12            |
| Ru1-N2  | 2.14(4)         | 2.21              | 2.21            |  | Os1-N2  | 2.20              | 2.20            |
| Ru1-N8  | 2.04(5)         | 2.10              | 2.09            |  | Os1-N8  | 2.10              | 2.10            |
| Ru1-N7  | 2.06(5)         | 2.10              | 2.13            |  | Os1-N7  | 2.10              | 2.13            |
| Ru1-N9  | 2.04(5)         | 2.09              | 2.06            |  | Os1-N9  | 2.09              | 2.08            |
| Ru1-N10 | 2.04(4)         | 2.07              | 2.05            |  | Os1-N10 | 2.08              | 2.07            |
| Ru2-N4  | 2.16(4)         | 2.21              | 2.21            |  | Os2-N4  | 2.20              | 2.20            |
| Ru2-N6  | 2.10(4)         | 2.11              | 2.11            |  | Os2-N6  | 2.12              | 2.12            |
| Ru2-N14 | 2.07(5)         | 2.10              | 2.10            |  | Os2-N14 | 2.10              | 2.10            |
| Ru2-N13 | 2.05(5)         | 2.10              | 2.10            |  | Os2-N13 | 2.10              | 2.10            |
| Ru2-N12 | 2.05(5)         | 2.09              | 2.09            |  | Os2-N12 | 2.09              | 2.09            |
| Ru2-N11 | 2.04(4)         | 2.07              | 2.07            |  | Os2-N11 | 2.08              | 2.08            |

**Table S3** Selected calculated bond angles (°) for **1** and **2** in ground and UKS optimized state along with available X-ray crystal data

|             | <b>1</b>        |                   |                 |  | <b>2</b>     |                   |                 |
|-------------|-----------------|-------------------|-----------------|--|--------------|-------------------|-----------------|
|             | Exp<br><b>1</b> | Soln.<br><b>1</b> | UKS<br><b>1</b> |  |              | Soln.<br><b>2</b> | UKS<br><b>2</b> |
| N1-Ru1-N2   | 78.20(17)       | 77.82             | 77.60           |  | N1-Os1-N2    | 77.10             | 77.11           |
| N1-Ru1-N8   | 172.33(19)      | 173.69            | 173.73          |  | N1- Os1-N8   | 173.39            | 173.87          |
| N1-Ru1-N7   | 93.74(19)       | 96.33             | 98.14           |  | N1- Os1-N7   | 96.69             | 98.69           |
| N1-Ru1-N9   | 92.11(18)       | 88.43             | 86.36           |  | N1- Os1-N9   | 88.14             | 86.36           |
| N1-Ru1-N10  | 94.88(19)       | 93.98             | 93.33           |  | N1- Os1-N10  | 94.50             | 93.93           |
| N2-Ru1-N8   | 100.25(17)      | 103.81            | 105.87          |  | N2- Os1-N8   | 104.56            | 106.28          |
| N2-Ru1-N7   | 87.82(17)       | 86.54             | 84.46           |  | N2- Os1-N7   | 85.95             | 84.34           |
| N2-Ru1-N9   | 96.79(18)       | 97.50             | 98.37           |  | N2- Os1-N9   | 98.16             | 98.57           |
| N2-Ru1-N10  | 172.08(18)      | 171.01            | 170.85          |  | N2- Os1-N10  | 170.85            | 170.88          |
| N8-Ru1-N7   | 78.66(19)       | 77.78             | 77.20           |  | N8- Os1-N7   | 77.14             | 76.78           |
| N8-Ru1-N9   | 95.54(19)       | 97.32             | 98.14           |  | N8- Os1-N9   | 97.88             | 98.03           |
| N8-Ru1-N10  | 87.12(19)       | 84.72             | 83.25           |  | N8- Os1-N10  | 84.19             | 82.78           |
| N7-Ru1-N9   | 173.19(19)      | 174.32            | 175.11          |  | N7- Os1-N9   | 174.26            | 174.63          |
| N7-Ru1-N10  | 96.54(18)       | 98.12             | 98.21           |  | N7- Os1-N10  | 98.77             | 98.85           |
| N9-Ru1-N10  | 79.48(18)       | 78.41             | 79.59           |  | N9- Os1-N10  | 77.70             | 78.93           |
| N4-Ru2-N12  | 169.38(18)      | 170.96            | 170.86          |  | N4-Os2-N12   | 170.75            | 170.77          |
| N4-Ru2-N14  | 103.08(17)      | 103.89            | 104.00          |  | N4- Os2-N14  | 104.66            | 104.64          |
| N4-Ru2-N11  | 94.86(18)       | 97.46             | 97.31           |  | N4- Os2-N11  | 98.08             | 98.00           |
| N4-Ru2-N13  | 90.08(18)       | 86.56             | 86.64           |  | N4- Os2-N13  | 86.01             | 86.04           |
| N6-Ru2-N4   | 78.44(17)       | 77.81             | 77.79           |  | N6- Os2-N4   | 77.10             | 77.08           |
| N6-Ru2-N14  | 176.46(18)      | 173.70            | 173.62          |  | N6- Os2-N14  | 173.41            | 173.29          |
| N6-Ru2-N13  | 97.38(18)       | 96.36             | 96.30           |  | N6- Os2-N13  | 96.74             | 96.62           |
| N6-Ru2-N11  | 88.25(18)       | 88.43             | 88.45           |  | N6- Os2-N11  | 88.14             | 88.19           |
| N6-Ru2-N12  | 92.12(18)       | 93.94             | 93.91           |  | N6- Os2-N12  | 94.42             | 94.49           |
| N13-Ru2-N11 | 173.17(19)      | 174.13            | 174.37          |  | N13- Os2-N11 | 174.23            | 174.31          |
| N13-Ru2-N12 | 96.01(19)       | 98.15             | 98.21           |  | N13- Os2-N12 | 98.80             | 98.83           |
| N11-Ru2-N12 | 79.85(19)       | 78.41             | 78.42           |  | N11- Os2-N12 | 77.70             | 77.71           |
| N14-Ru2-N13 | 79.47(18)       | 77.78             | 77.78           |  | N14- Os2-N13 | 77.15             | 77.14           |
| N14-Ru2-N11 | 94.78(18)       | 97.29             | 97.31           |  | N14- Os2-N11 | 97.81             | 97.89           |
| N14-Ru2-N12 | 86.63(18)       | 84.69             | 84.64           |  | N14- Os2-N12 | 84.16             | 84.14           |



**Table S4** Selected molecular orbital along with their energies and compositions for **1** and **2** in solution phase

|        | Energy/ eV | (%) Composition          |              |          |       |
|--------|------------|--------------------------|--------------|----------|-------|
|        |            | <b>1 (%) Composition</b> |              |          |       |
| MO     | <b>1</b>   | Ru <sup>II</sup>         | pyrene imida | pyridine | bpy   |
| LUMO+3 | -2.59      | 5.33                     | 12.02        | 12.49    | 70.14 |
| LUMO+2 | -2.61      | 6.27                     | 3.52         | 1.06     | 89.13 |
| LUMO+1 | -2.65      | 2.06                     | 9.13         | 7.10     | 81.68 |
| LUMO   | -2.65      | 1.81                     | 6.68         | 5.48     | 86.02 |
| HOMO   | -5.93      | 23.83                    | 65.59        | 7.25     | 3.30  |
| HOMO-1 | -6.09      | 80.08                    | 5.59         | 3.44     | 10.87 |
| HOMO-2 | -6.18      | 60.22                    | 26.06        | 5.06     | 8.64  |
| HOMO-3 | -6.27      | 73.44                    | 10.11        | 3.52     | 12.91 |
|        |            | <b>2 (%) Composition</b> |              |          |       |
|        |            | Os <sup>II</sup>         | pyrene imida | pyridine | bpy   |
| MO     | <b>2</b>   | 8.02                     | 12.25        | 12.99    | 66.73 |
| LUMO+3 | -2.58      | 8.42                     | 11.97        | 6.42     | 73.17 |
| LUMO+2 | -2.59      | 1.60                     | 13.26        | 15.97    | 69.15 |
| LUMO+1 | -2.71      | 1.63                     | 10.42        | 12.96    | 74.96 |
| LUMO   | -2.72      | 65.64                    | 19.23        | 4.64     | 10.47 |
| HOMO   | -5.77      | 79.23                    | 4.54         | 3.75     | 12.46 |
| HOMO-1 | -5.81      | 70.77                    | 8.67         | 4.58     | 15.96 |
| HOMO-2 | -6.04      | 67.74                    | 10.08        | 5.49     | 16.67 |
| HOMO-3 | -6.05      |                          |              |          |       |

**Table S5** Selected molecular orbital along with their energies and compositions for **1** and **2** in UKS optimized state

|        | Energy/ eV | (%) Composition          |              |          |       |
|--------|------------|--------------------------|--------------|----------|-------|
|        |            | <b>1 (%) Composition</b> |              |          |       |
| MO     | <b>1</b>   | Ru <sup>II</sup>         | pyrene imida | pyridine | bpy   |
| LUMO+3 | -2.61      | 5.94                     | 4.11         | 4.86     | 85.07 |
| LUMO+2 | -2.66      | 1.66                     | 6.09         | 9.03     | 83.21 |
| LUMO+1 | -2.86      | 2.37                     | 38.44        | 57.61    | 1.55  |
| LUMO   | -2.95      | 2.90                     | 0.51         | 0.15     | 96.42 |
| HOMO   | -3.89      | 3.81                     | 10.91        | 0.51     | 84.75 |
| HOMO-1 | -6.02      | 38.25                    | 49.99        | 6.45     | 5.29  |
| HOMO-2 | -6.19      | 44.93                    | 42.48        | 6.02     | 6.54  |
| HOMO-3 | -6.30      | 75.12                    | 8.95         | 2.53     | 13.39 |
|        |            | <b>2 (%) Composition</b> |              |          |       |
|        |            | Os <sup>II</sup>         | pyrene imida | pyridine | bpy   |
| MO     | <b>2</b>   | 4.31                     | 20.57        | 26.06    | 49.03 |
| LUMO+3 | -2.64      | 4.54                     | 31.17        | 45.31    | 18.97 |
| LUMO+2 | -2.89      | 5.60                     | 3.85         | 5.09     | 85.45 |
| LUMO+1 | -2.94      | 3.50                     | 7.61         | 4.67     | 84.02 |
| LUMO   | -3.15      | 3.80                     | 8.45         | 4.01     | 83.71 |
| HOMO   | -3.38      | 53.86                    | 30.14        | 5.43     | 10.54 |
| HOMO-1 | -6.00      |                          |              |          |       |

|        |       |  |       |       |      |       |
|--------|-------|--|-------|-------|------|-------|
| HOMO-2 | -6.16 |  | 67.05 | 11.44 | 5.54 | 15.96 |
| HOMO-3 | -6.20 |  | 31.92 | 58.09 | 4.54 | 5.42  |

**Table S6** Binding constants of **1** and **2** with DNA in 50mM, 300mM and 1000mM ionic strength tris buffer solution (pH=7.30)

| Complex                 | From Absorption( $K_b$ )                                                  | From Emission( $K_b$ )                                                    |
|-------------------------|---------------------------------------------------------------------------|---------------------------------------------------------------------------|
| <b>Strength 50 mM</b>   |                                                                           |                                                                           |
| <b>1</b>                | $K_b = (7.23 \pm 0.59) \times 10^6 \text{ M}^{-1}$<br>$s = 2.07 \pm 0.02$ | $K_b = (7.04 \pm 0.65) \times 10^6 \text{ M}^{-1}$<br>$s = 1.98 \pm 0.02$ |
| <b>2</b>                | $K_b = (7.51 \pm 0.65) \times 10^6 \text{ M}^{-1}$<br>$s = 1.96 \pm 0.02$ | $K_b = 7.74 \pm 0.64 \times 10^6 \text{ M}^{-1}$<br>$s = 1.99 \pm 0.01$   |
| <b>Strength 300 mM</b>  |                                                                           |                                                                           |
| <b>1</b>                | $K_b = (7.62 \pm 0.17) \times 10^5 \text{ M}^{-1}$<br>$s = 2.04 \pm 0.05$ | $K_b = (7.72 \pm 0.14) \times 10^5 \text{ M}^{-1}$<br>$s = 1.99 \pm 0.02$ |
| <b>2</b>                | $K_b = (8.14 \pm 0.14) \times 10^5 \text{ M}^{-1}$<br>$s = 2.06 \pm 0.03$ | $K_b = (8.04 \pm 0.08) \times 10^5 \text{ M}^{-1}$<br>$s = 1.98 \pm 0.05$ |
| <b>Strength 1000 mM</b> |                                                                           |                                                                           |
| <b>1</b>                | $K_b = (3.14 \pm 0.21) \times 10^5 \text{ M}^{-1}$<br>$s = 1.99 \pm 0.08$ | $K_b = (3.32 \pm 0.19) \times 10^5 \text{ M}^{-1}$<br>$s = 2.03 \pm 0.04$ |
| <b>2</b>                | $K_b = (4.24 \pm 0.17) \times 10^5 \text{ M}^{-1}$<br>$s = 2.09 \pm 0.02$ | $K_b = (4.76 \pm 0.11) \times 10^5 \text{ M}^{-1}$<br>$s = 2.10 \pm 0.02$ |

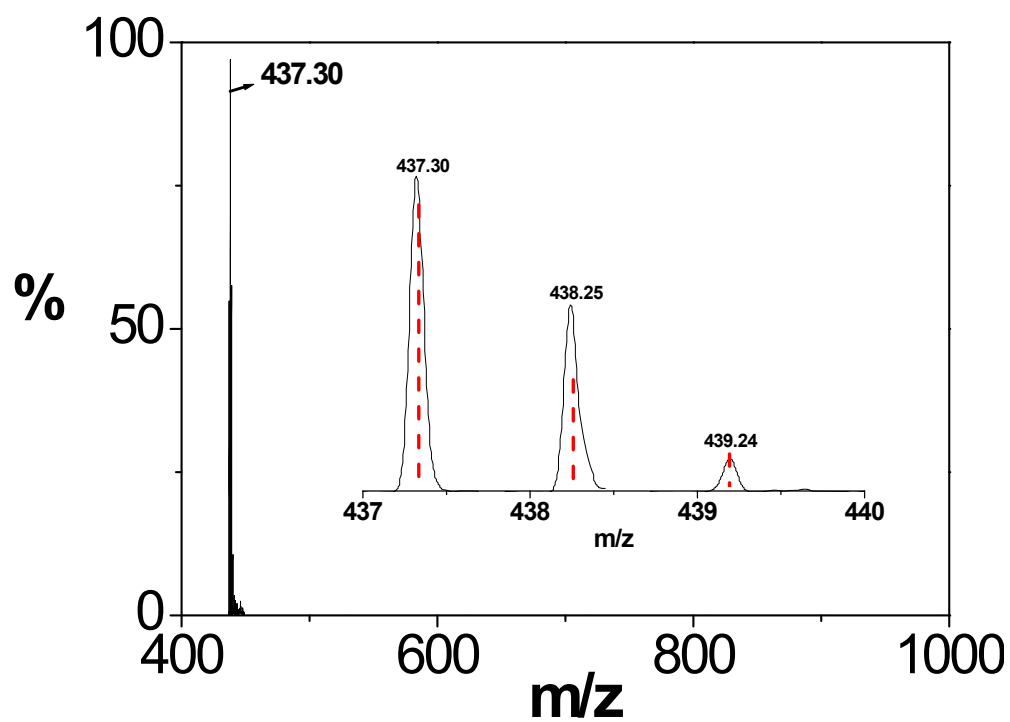

**Fig. S1** ESI-MS (positive) for the cation  $\text{H}_3\text{Imz}_2\text{PPy}_2^+$  ( $m/z = 437.30$ ) in acetonitrile showing the observed and isotopic distribution patterns.

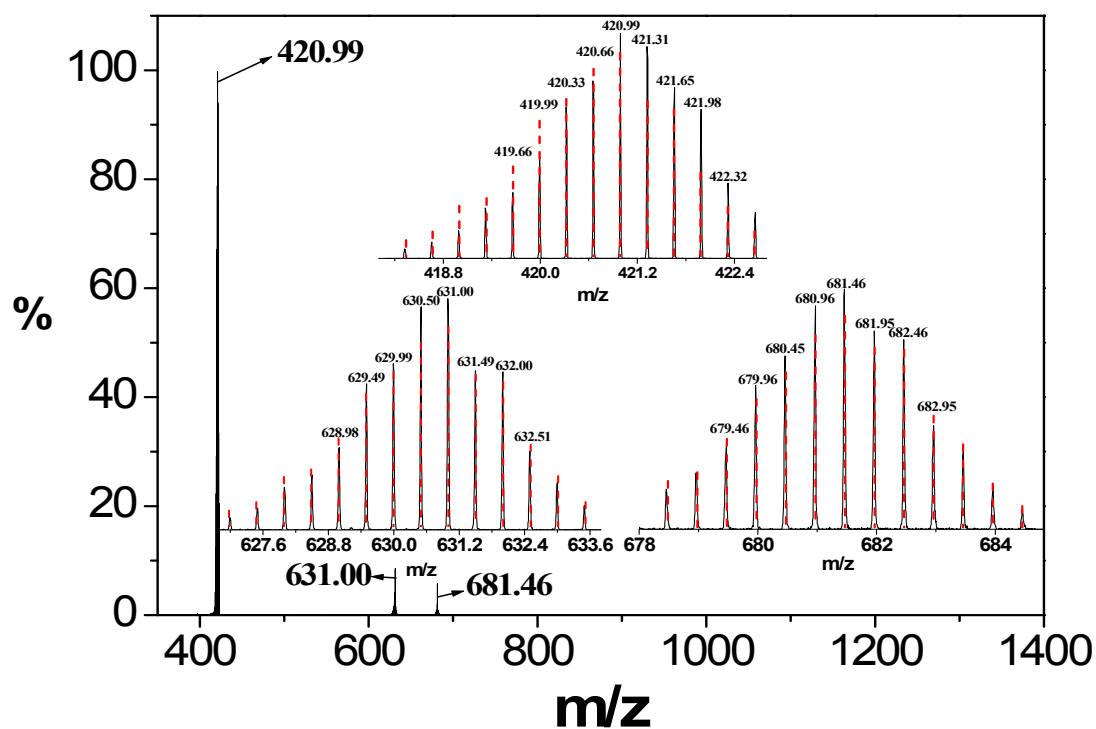

**Fig. S2** ESI-MS (positive) for the complex cations of **1**, [(bpy)<sub>2</sub>Ru(HImz<sub>2</sub>PPy<sub>2</sub>)Ru(bpy)<sub>2</sub>]<sup>3+</sup> (*m/z* = 420.99), [(bpy)<sub>2</sub>Ru(Imz<sub>2</sub>PPy<sub>2</sub>)Ru(bpy)<sub>2</sub>]<sup>2+</sup> (*m/z* = 631.00) and [(bpy)<sub>2</sub>Ru(HImz<sub>2</sub>PPy<sub>2</sub>)Ru(bpy)<sub>2</sub>(ClO<sub>4</sub>)]<sup>2+</sup> (*m/z* = 681.46) in acetonitrile showing both experimental and simulated isotopic distribution patterns.

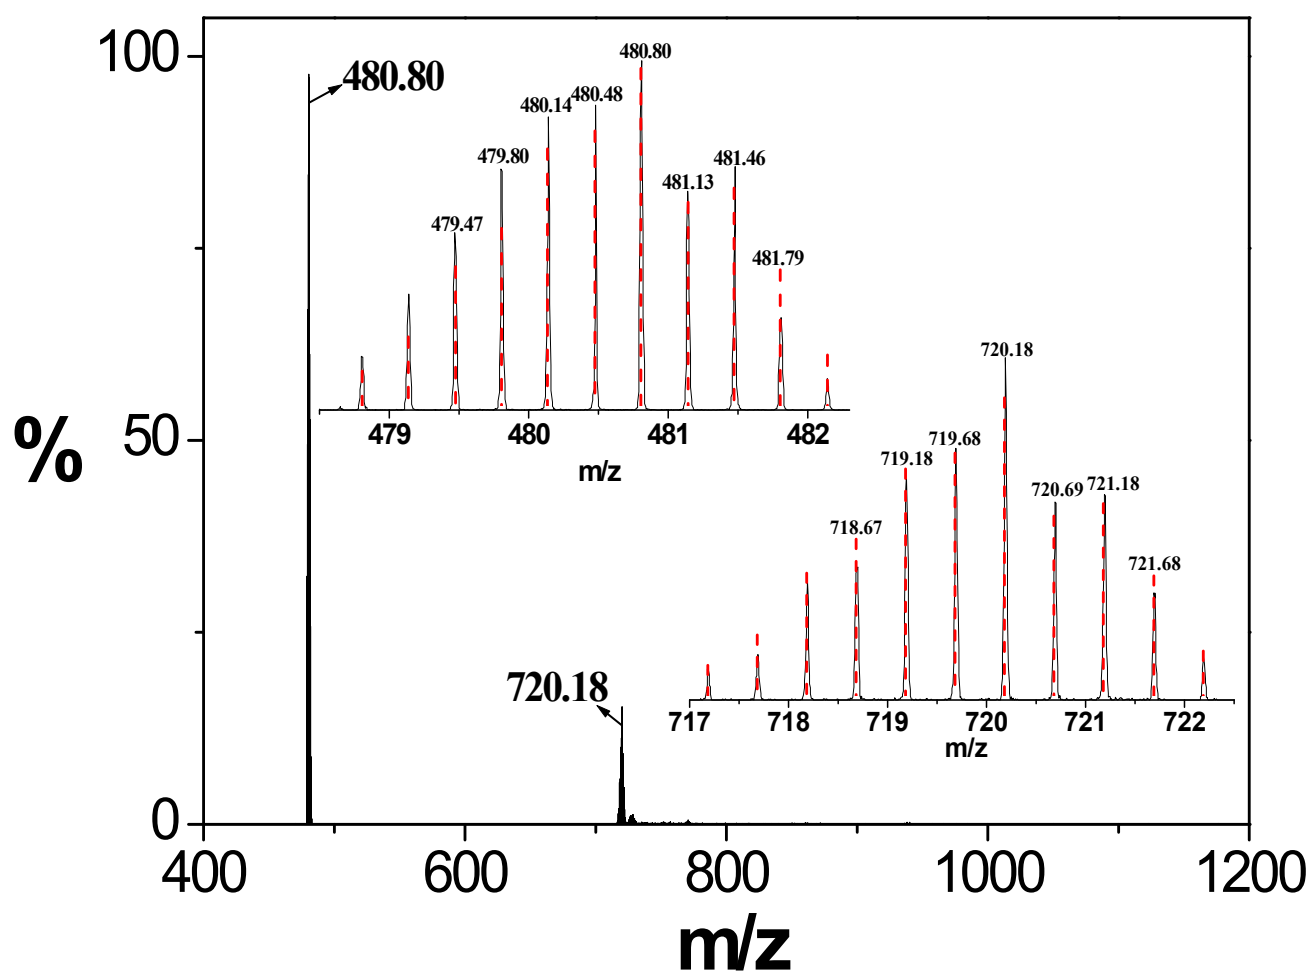

**Fig. S3** ESI-MS (positive) for the complex cations of **2**,  $[(bpy)_2Os(HImz_2PPy_2)Os(bpy)_2]^{3+}$  ( $m/z = 480.80$ ),  $[(bpy)_2Os(Imz_2PPy_2)Os(bpy)_2]^{2+}$  ( $m/z = 720.18$ ) in acetonitrile showing the observed and isotopic distribution patterns.

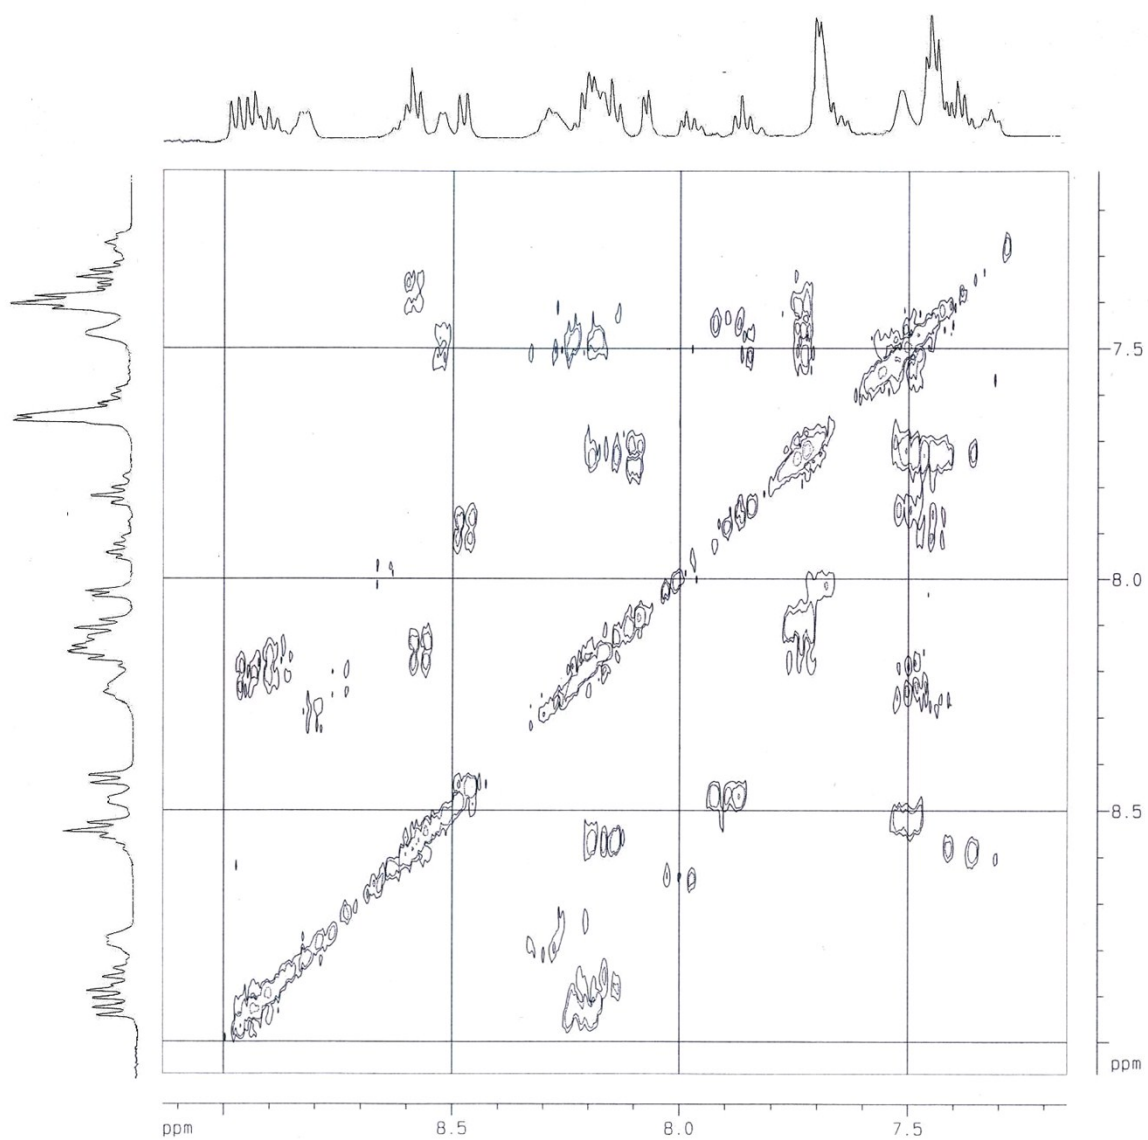

**Fig. S4**  $^1\text{H}$ - $^1\text{H}$  COSY NMR spectrum of **1** in  $\text{DMSO-}d_6$ .

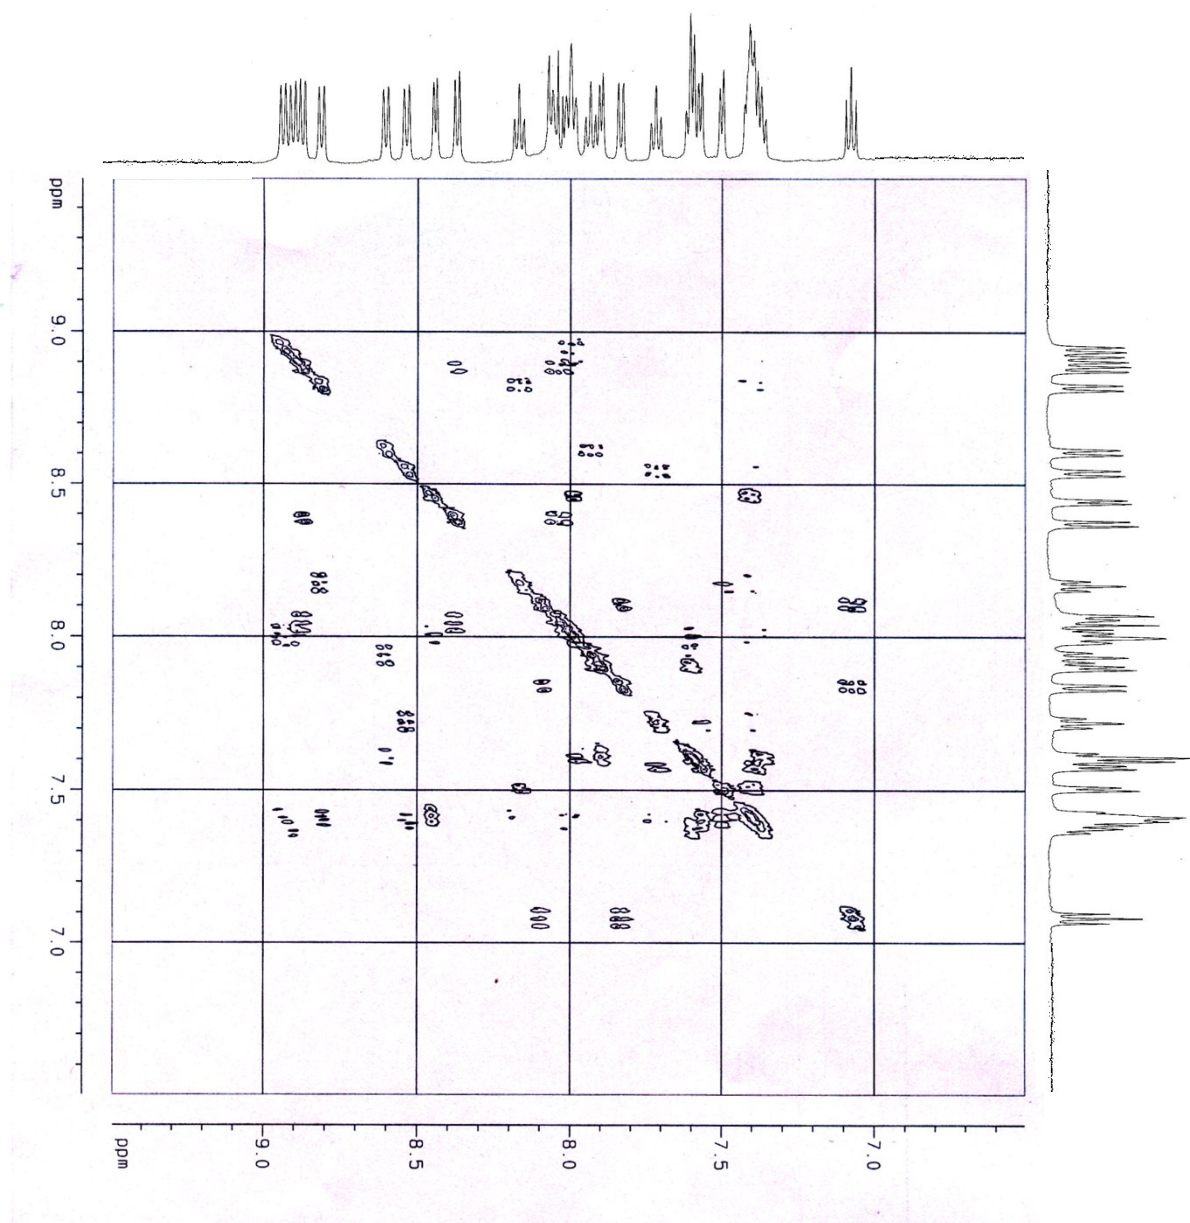

**Fig. S5**  $^1\text{H}$ - $^1\text{H}$  COSY NMR spectrum of **2** in  $\text{DMSO}-d_6$ .

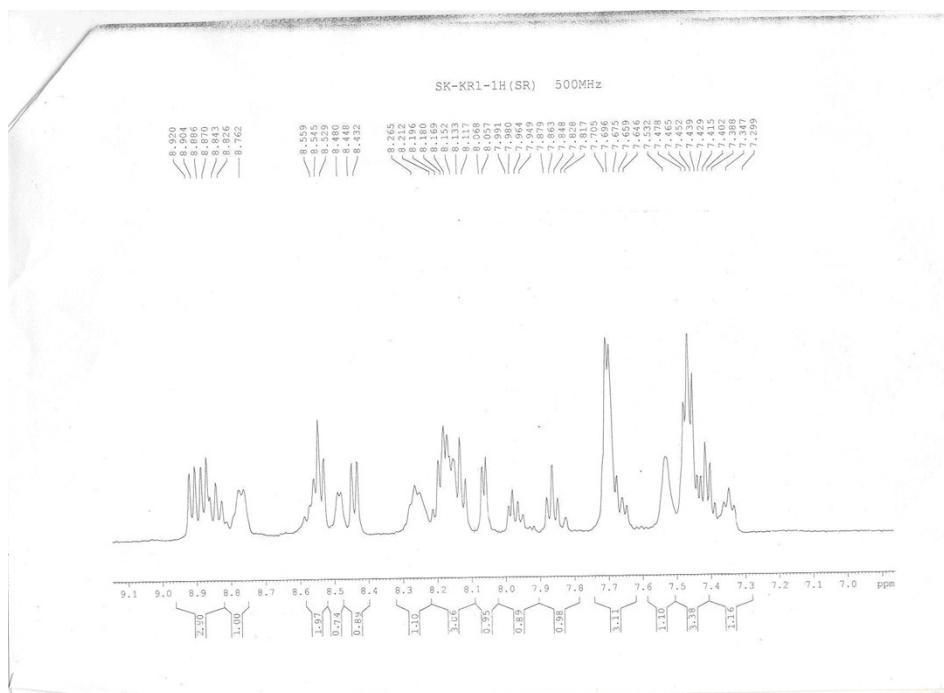

**Fig. S6** Scanned  $^1\text{H}$  NMR spectrum of complex **1** in  $\text{DMSO}-d_6$

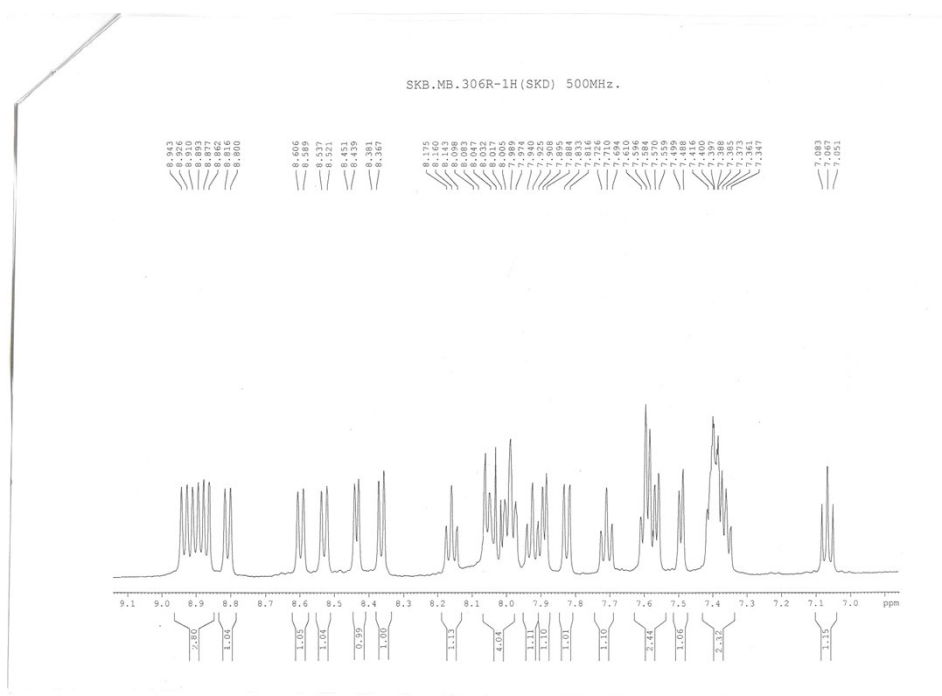

**Fig. S7** Scanned  $^1\text{H}$  NMR spectrum of complex **2** in  $\text{DMSO}-d_6$



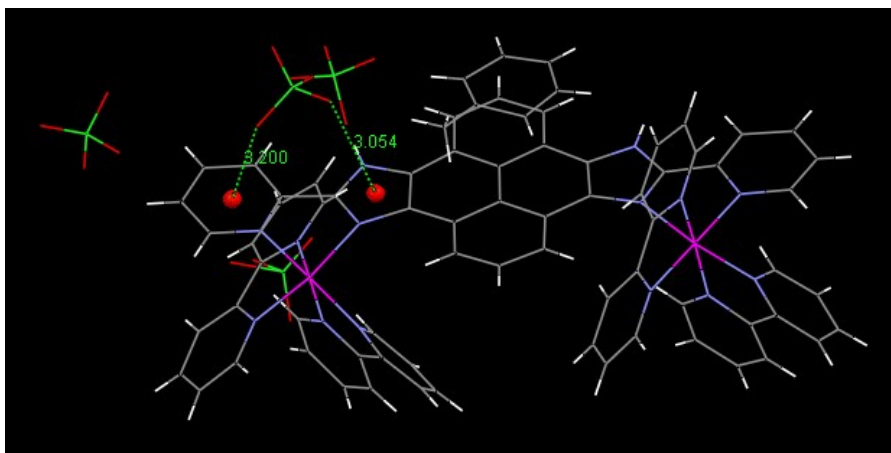

**Fig. S8** Occurrence of anion- $\pi$  interaction within **1**.

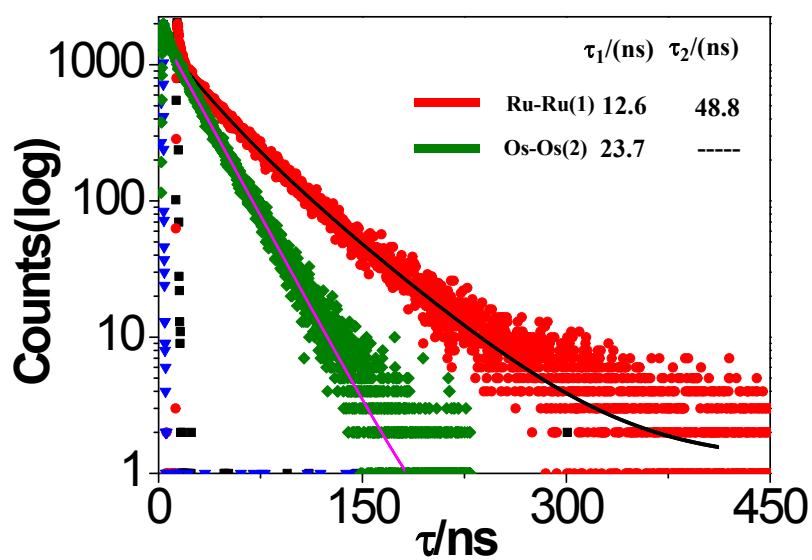

**Fig. S9** Time resolved decay profile of **1** and **2** in acetonitrile in their free state. Lifetimes of the complexes were acquired following excitation at 450 nm.

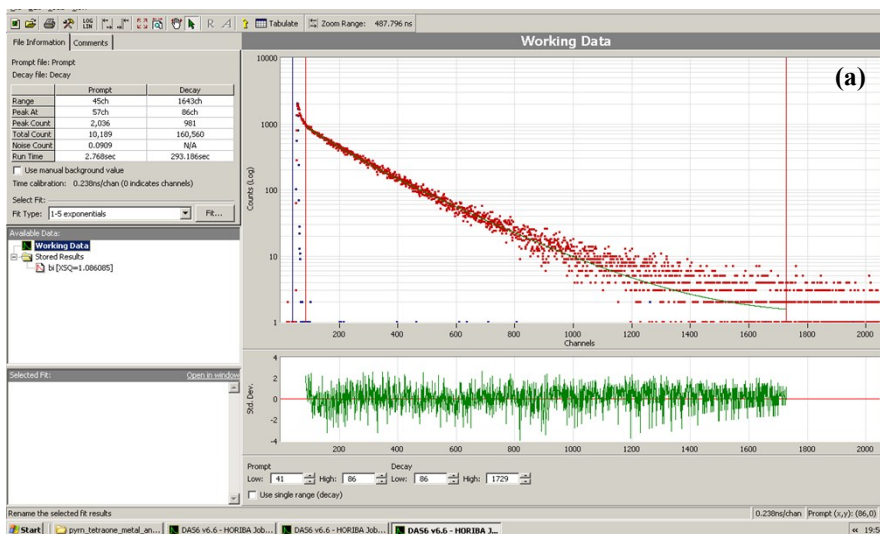

The fitted parameters are:

Hi reduced to: 1672 ch

SHIFT = 3.661401E-02 ch  
8.725042E-12 sec  
S.Dev = 1.132722E-10 sec

T1 = 53.05135 ch  
1.264203E-08 sec  
S.Dev = 1.437123E-09 sec

T2 = 199.9002 ch  
4.88358E-08 sec  
S.Dev = 2.417946E-10 sec

A = 1.617484  
S.Dev = 6.625398E-02

B1 = 4.368845E-02  
[12.51 Rel.Ampl]  
S.Dev = 1.003443E-03

B2 = 8.110892E-02  
[87.49 Rel.Ampl]  
S.Dev = 3.004865E-04

CHISQ = 1.144919  
[ 1595 degrees of freedom ]

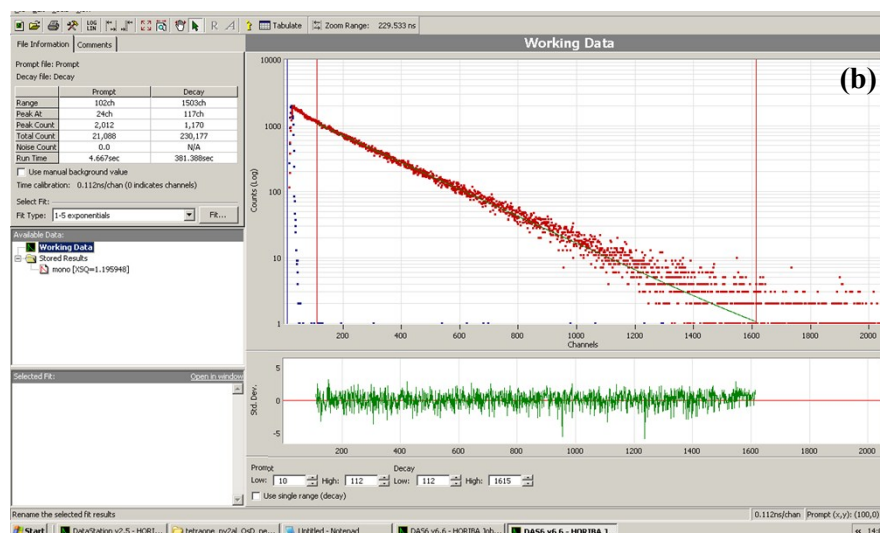

The fitted parameters are:

SHIFT = 0.4 ch  
4.485248E-11 sec  
S.Dev = 4.485248E-11 sec

T1 = 212.1192 ch  
2.378518E-08 sec  
S.Dev = 6.840385E-11 sec

A = 0.1609985  
S.Dev = 0.0713059

B1 = 7.701083E-02  
[100.00 Rel.Ampl]  
S.Dev = 1.650364E-04

CHISQ = 1.195948  
[ 1500 degrees of freedom ]

**Fig. S10** Fitted images and corresponding statistics of fit for the luminescence decay profile of **1** (a) and **2**(b) respectively in acetonitrile in their free states.

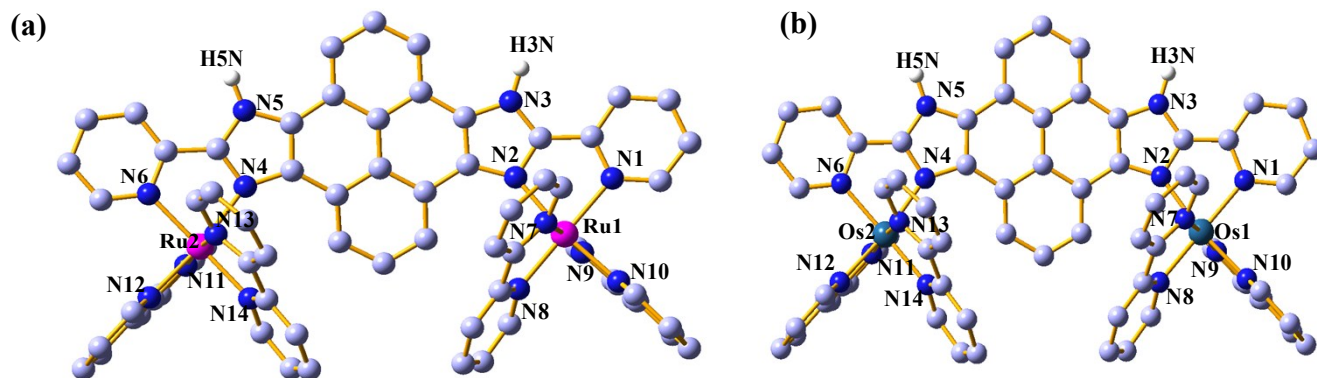

**Fig. S11** Optimized geometries and labelling scheme for (a)  $[(\text{bpy})_2\text{Ru}(\text{H}_2\text{Imz}_2\text{PPy}_2)\text{Ru}(\text{bpy})_2]^{4+}$  (**1**) and (b)  $[(\text{bpy})_2\text{Os}(\text{H}_2\text{Imz}_2\text{PPy}_2)\text{Os}(\text{bpy})_2]^{4+}$  (**2**) in solution phase.

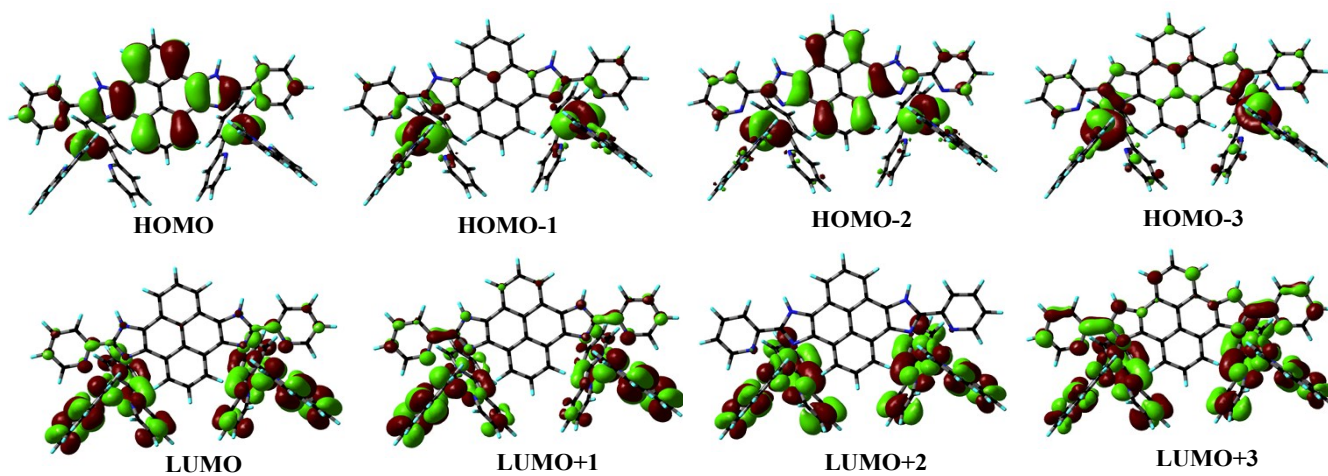

**Fig. S12** Schematic drawings of the selective frontier molecular orbitals for  $[(\text{bpy})_2\text{Ru}(\text{H}_2\text{Imz}_2\text{PPy}_2)\text{Ru}(\text{bpy})_2]^{4+}$  (**1**) in solution phase.

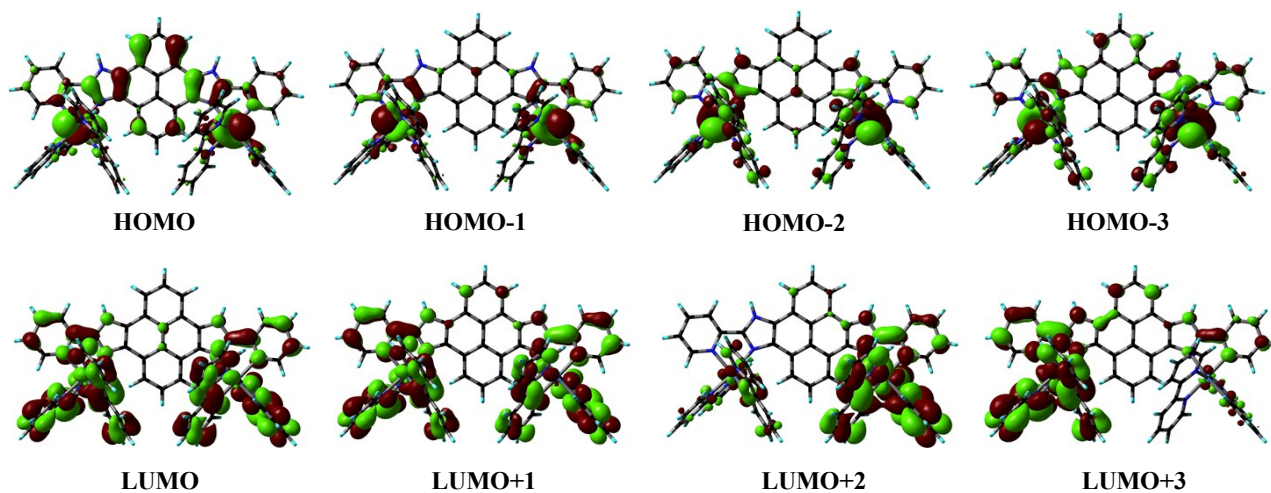

**Fig. S13** Schematic drawings of the selective frontier molecular orbitals for  $[(bpy)_2Os(H_2Imz_2PPy_2)Os(bpy)_2]^{4+}$  (**2**) in solution phase.

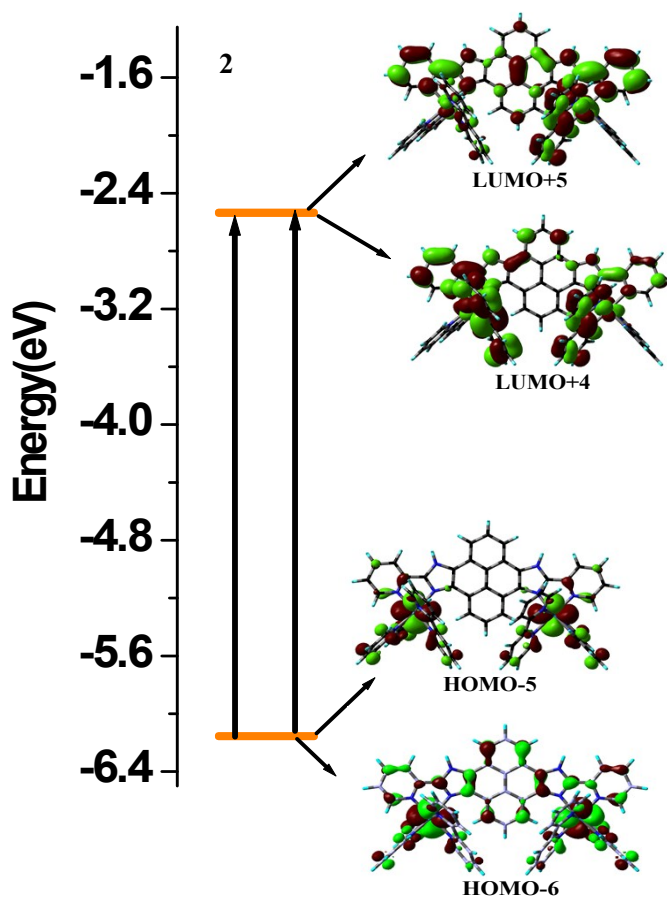

**Fig. S14** Energy level diagrams depicting the dominant transitions that comprise the lowest-energy absorption band for  $[(bpy)_2Os(H_2Imz_2PPy_2)Os(bpy)_2]^{4+}$  (**2**) in acetonitrile.



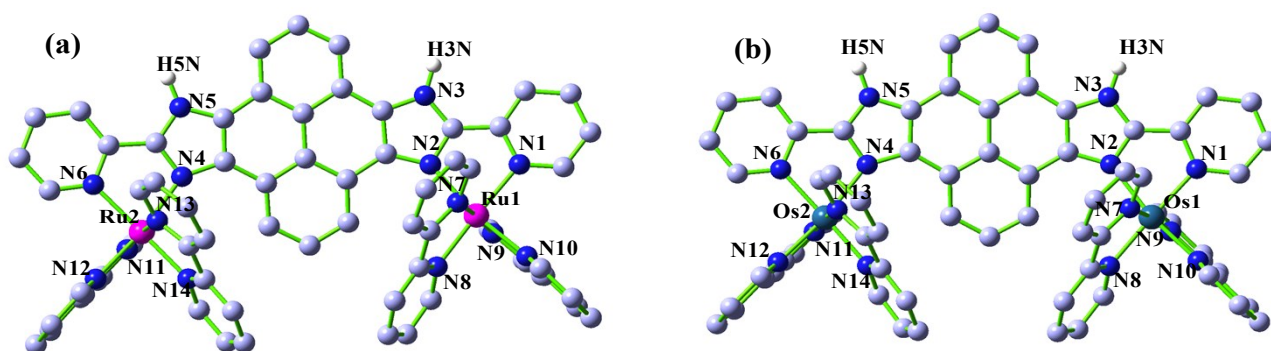

**Fig. S15** Optimized geometries and labelling scheme for  $[(\text{bpy})_2\text{Ru}(\text{H}_2\text{Imz}_2\text{PPy}_2)\text{Ru}(\text{bpy})_2]^{4+}$  (**1**) and  $[(\text{bpy})_2\text{Os}(\text{H}_2\text{Imz}_2\text{PPy}_2)\text{Os}(\text{bpy})_2]^{4+}$  (**2**) in UKS state.

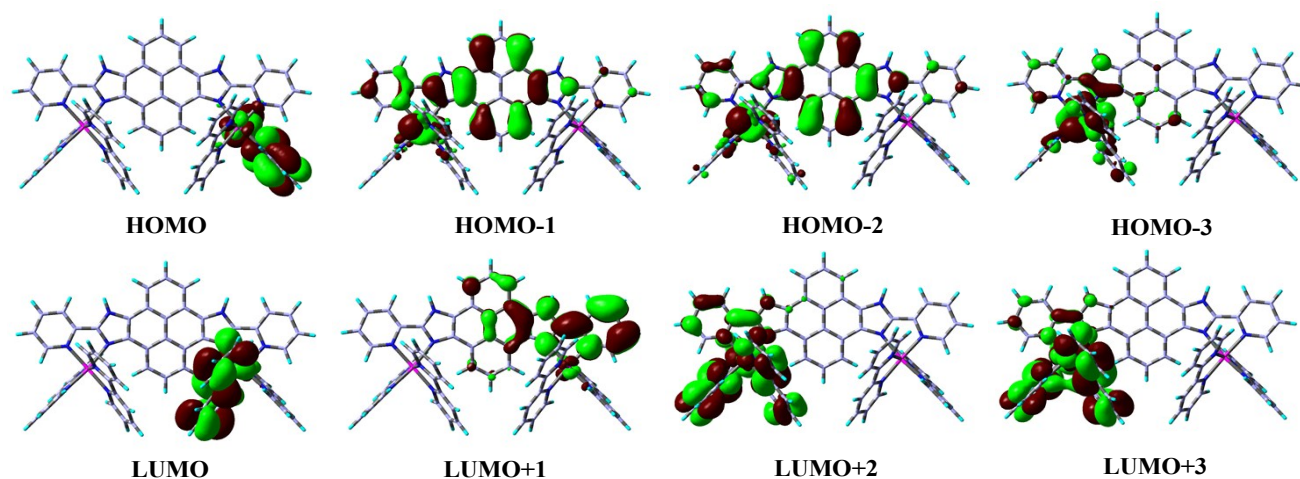

**Fig. S16** Schematic drawings of the selective frontier molecular orbitals for  $[(\text{bpy})_2\text{Ru}(\text{H}_2\text{Imz}_2\text{PPy}_2)\text{Ru}(\text{bpy})_2]^{4+}$  (**1**) in UKS optimized state.

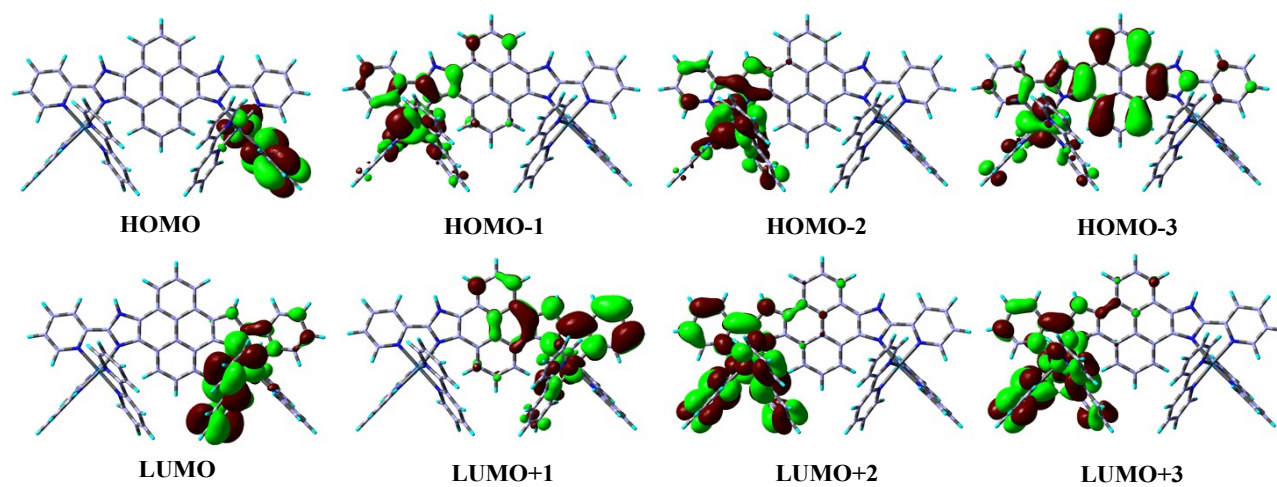

**Fig. S17** Schematic drawings of the selective frontier molecular orbitals for  $[(bpy)_2Os(H_2Imz_2PPy_2)Os(bpy)_2]^{4+}$  (**2**) in UKS optimized state.

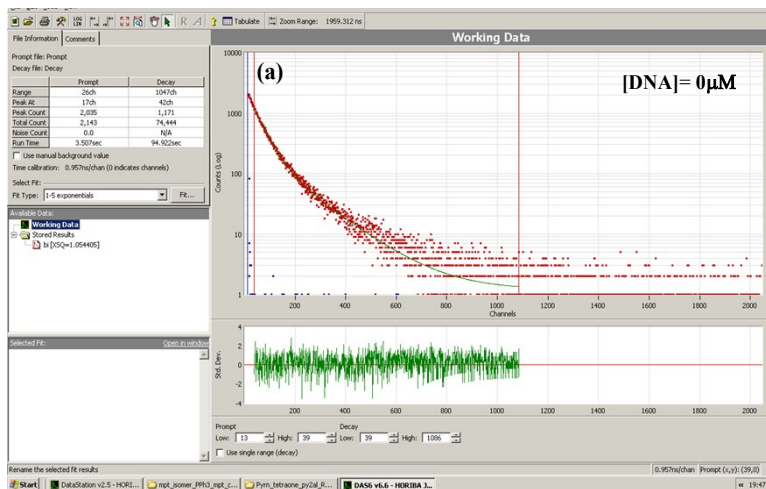

The fitted parameters are:

SHIFT = 1.9 ch  
 1.818609E-09 sec  
 S.Dev = 1.69639E-09 sec

T1 = 42.97166 ch  
 4.143087E-08 sec  
 S.Dev = 7.184974E-10 sec

T2 = 144.4753 ch  
 1.341863E-07 sec  
 S.Dev = 1.83166E-09 sec

A = 1.023088  
 S.Dev = 5.134795E-02

B1 = 0.7422737  
 [66.34 Rel.Ampl]  
 S.Dev = 5.226232E-03

B2 = 0.1120418  
 [33.66 Rel.Ampl]  
 S.Dev = 1.130217E-03

CHISQ = 1.008743  
 [ 1253 degrees of freedom ]

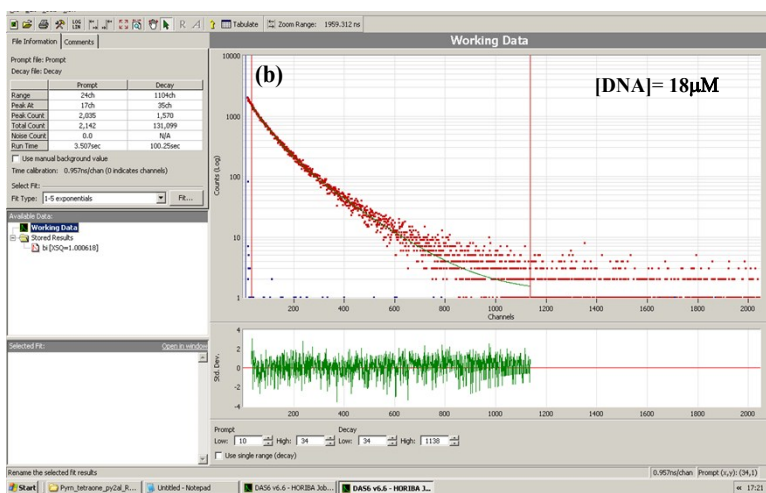

The fitted parameters are:

SHIFT = -8.214164E-02 ch  
 -7.862292E-11 sec  
 S.Dev = 3.9433E-09 sec

T1 = 59.02127 ch  
 5.429296E-08 sec  
 S.Dev = 1.411408E-09 sec

T2 = 151.5714 ch  
 1.650785E-07 sec  
 S.Dev = 1.572596E-09 sec

A = 1.230422  
 S.Dev = 7.701985E-02

B1 = 0.6455741  
 [51.68 Rel.Ampl]  
 S.Dev = 5.272183E-03

B2 = 0.2350785  
 [48.32 Rel.Ampl]  
 S.Dev = 1.822528E-03

CHISQ = 1.000618  
 [ 1099 degrees of freedom ]

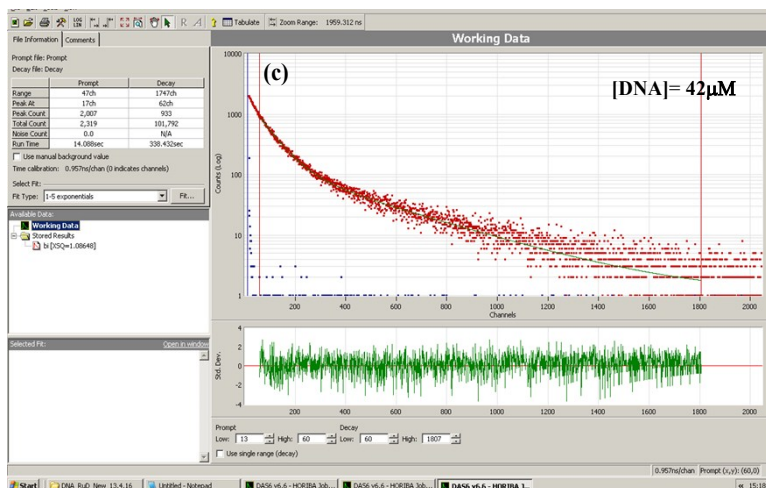

The fitted parameters are:

SHIFT = 2.0327 ch  
 1.945625E-09 sec  
 S.Dev = 1.285637E-09 sec

T1 = 67.54663 ch  
 6.635312E-08 sec  
 S.Dev = 8.873542E-10 sec

T2 = 335.6617 ch  
 3.352829E-07 sec  
 S.Dev = 4.446409E-09 sec

A = 1.026559  
 S.Dev = 6.958518E-02

B1 = 0.6158694  
 [65.10 Rel.Ampl]  
 S.Dev = 3.710504E-03

B2 = 6.645432E-02  
 [34.90 Rel.Ampl]  
 S.Dev = 5.109302E-04

CHISQ = 1.08648  
 [ 1742 degrees of freedom ]

**Fig. S18** Fitted images and corresponding statistics for the fit of each of the luminescence decay of **1** (a-c) in presence of increasing amount of CT-DNA in Tris-NaCl buffer medium (pH=7.30).

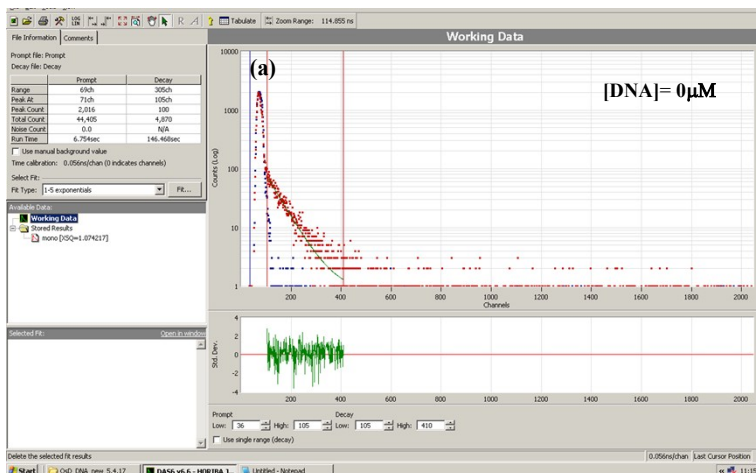

The fitted parameters are:

$$\begin{aligned} \text{SHIFT} &= -6.594157\text{E-}02 \text{ ch} \\ &= -3.699905\text{E-}12 \text{ sec} \\ \text{S.Dev} &= 1.261805\text{E-}10 \text{ sec} \end{aligned}$$

$$\begin{aligned} T1 &= 60.13293 \text{ ch} \\ &= 3.373989\text{E-}09 \text{ sec} \\ \text{S.Dev} &= 1.033712\text{E-}10 \text{ sec} \end{aligned}$$

$$\begin{aligned} A &= 0.8479583 \\ \text{S.Dev} &= 0.1325293 \end{aligned}$$

$$\begin{aligned} B1 &= 2.678487\text{E-}03 \\ &= [100.00 \text{ Rel.Amp}] \\ \text{S.Dev} &= 4.678271\text{E-}05 \end{aligned}$$

$$\begin{aligned} \text{CHISQ} &= 1.074217 \\ &= [ 302 \text{ degrees of freedom} ] \end{aligned}$$

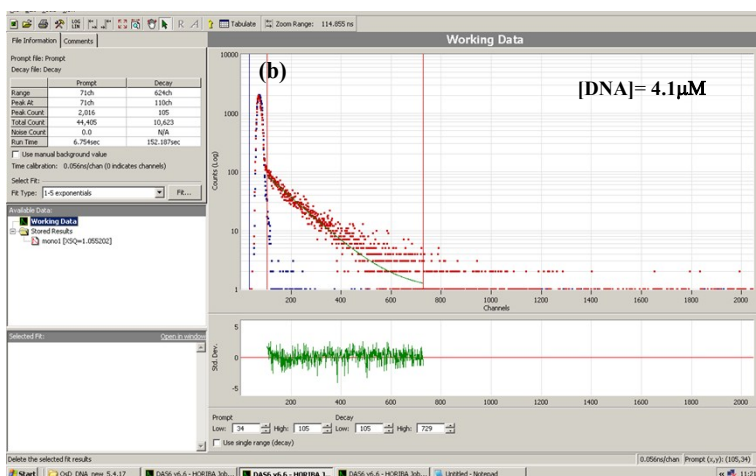

The fitted parameters are:

$$\begin{aligned} \text{SHIFT} &= -0.1310402 \text{ ch} \\ &= -7.352511\text{E-}12 \text{ sec} \\ \text{S.Dev} &= 3.349409\text{E-}10 \text{ sec} \end{aligned}$$

$$\begin{aligned} T1 &= 111.1268 \text{ ch} \\ &= 6.235195\text{E-}09 \text{ sec} \\ \text{S.Dev} &= 1.135144\text{E-}10 \text{ sec} \end{aligned}$$

$$\begin{aligned} A &= 0.9556906 \\ \text{S.Dev} &= 8.709306\text{E-}02 \end{aligned}$$

$$\begin{aligned} B1 &= 2.517672\text{E-}03 \\ &= [100.00 \text{ Rel.Amp}] \\ \text{S.Dev} &= 2.888786\text{E-}05 \end{aligned}$$

$$\begin{aligned} \text{CHISQ} &= 1.055202 \\ &= [ 621 \text{ degrees of freedom} ] \end{aligned}$$

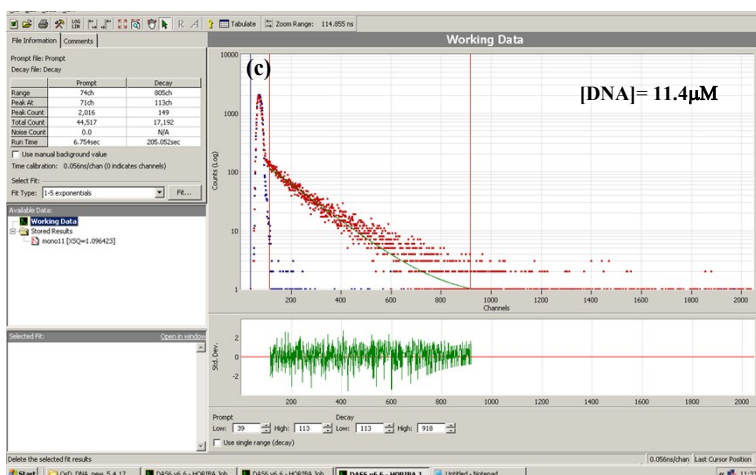

The fitted parameters are:

$$\begin{aligned} \text{SHIFT} &= -5.846859\text{E-}02 \text{ ch} \\ &= -3.280605\text{E-}12 \text{ sec} \\ \text{S.Dev} &= 2.832513\text{E-}10 \text{ sec} \end{aligned}$$

$$\begin{aligned} T1 &= 135.5538 \text{ ch} \\ &= 7.605765\text{E-}09 \text{ sec} \\ \text{S.Dev} &= 1.075715\text{E-}10 \text{ sec} \end{aligned}$$

$$\begin{aligned} A &= 0.7150995 \\ \text{S.Dev} &= 7.388485\text{E-}02 \end{aligned}$$

$$\begin{aligned} B1 &= 3.48344\text{E-}03 \\ &= [100.00 \text{ Rel.Amp}] \\ \text{S.Dev} &= 3.001725\text{E-}05 \end{aligned}$$

$$\begin{aligned} \text{CHISQ} &= 1.096423 \\ &= [ 802 \text{ degrees of freedom} ] \end{aligned}$$



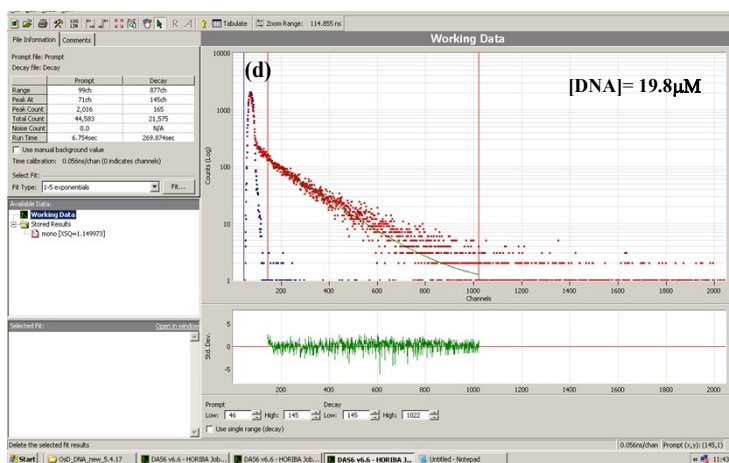

The fitted parameters are:

SHIFT = -9.999993E-02 ch  
-5.61088E-12 sec  
S.Dev = 8.336415E-10 sec

T1 = 153.2918 ch  
8.601025E-09 sec  
S.Dev = 1.121407E-10 sec

A = 0.8411134  
S.Dev = 7.882145E-02

B1 = 4.62003E-03  
[100.00 Rel.Ampl]  
S.Dev = 3.580114E-05

CHISQ = 1.149973  
[ 874 degrees of freedom ]

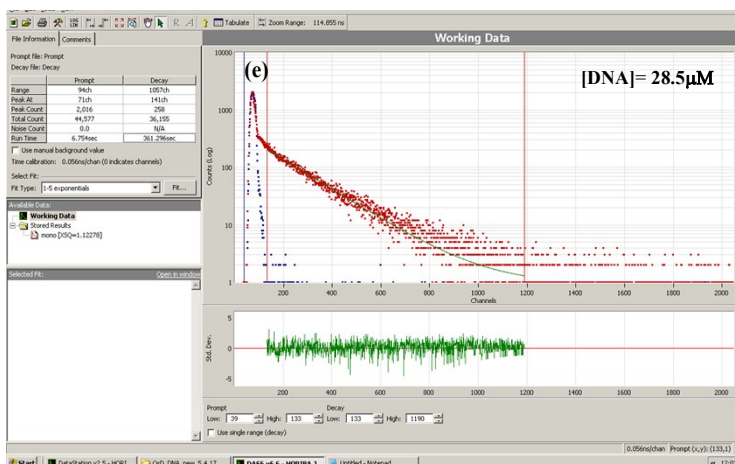

The fitted parameters are:

SHIFT = -9.999999E-02 ch  
-5.610883E-12 sec  
S.Dev = 7.500983E-10 sec

T1 = 165.403 ch  
9.280567E-09 sec  
S.Dev = 8.477425E-11 sec

A = 0.953526  
S.Dev = 7.079282E-02

B1 = 6.580617E-03  
[100.00 Rel.Ampl]  
S.Dev = 3.789648E-05

CHISQ = 1.12278  
[ 1054 degrees of freedom ]

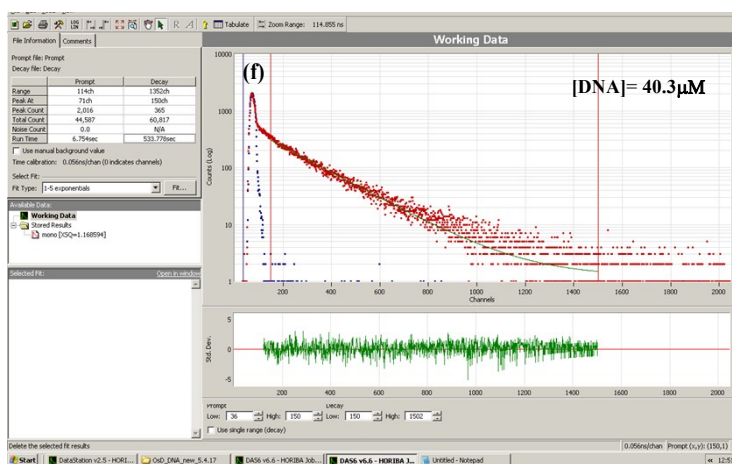

The fitted parameters are:

SHIFT = -0.1 ch  
-5.610884E-12 sec  
S.Dev = 6.517638E-10 sec

T1 = 190.7604 ch  
1.070335E-08 sec  
S.Dev = 6.548448E-11 sec

A = 1.167494  
S.Dev = 5.536998E-02

B1 = 1.007874E-02  
[100.00 Rel.Ampl]  
S.Dev = 4.354247E-05

CHISQ = 1.168594  
[ 1453 degrees of freedom ]

**Fig. S19** Fitted images and corresponding statistics for the fit of each of the luminescence decay of **2** (a-f) in presence of increasing amount of CT-DNA in Tris-NaCl buffer medium (pH=7.30).

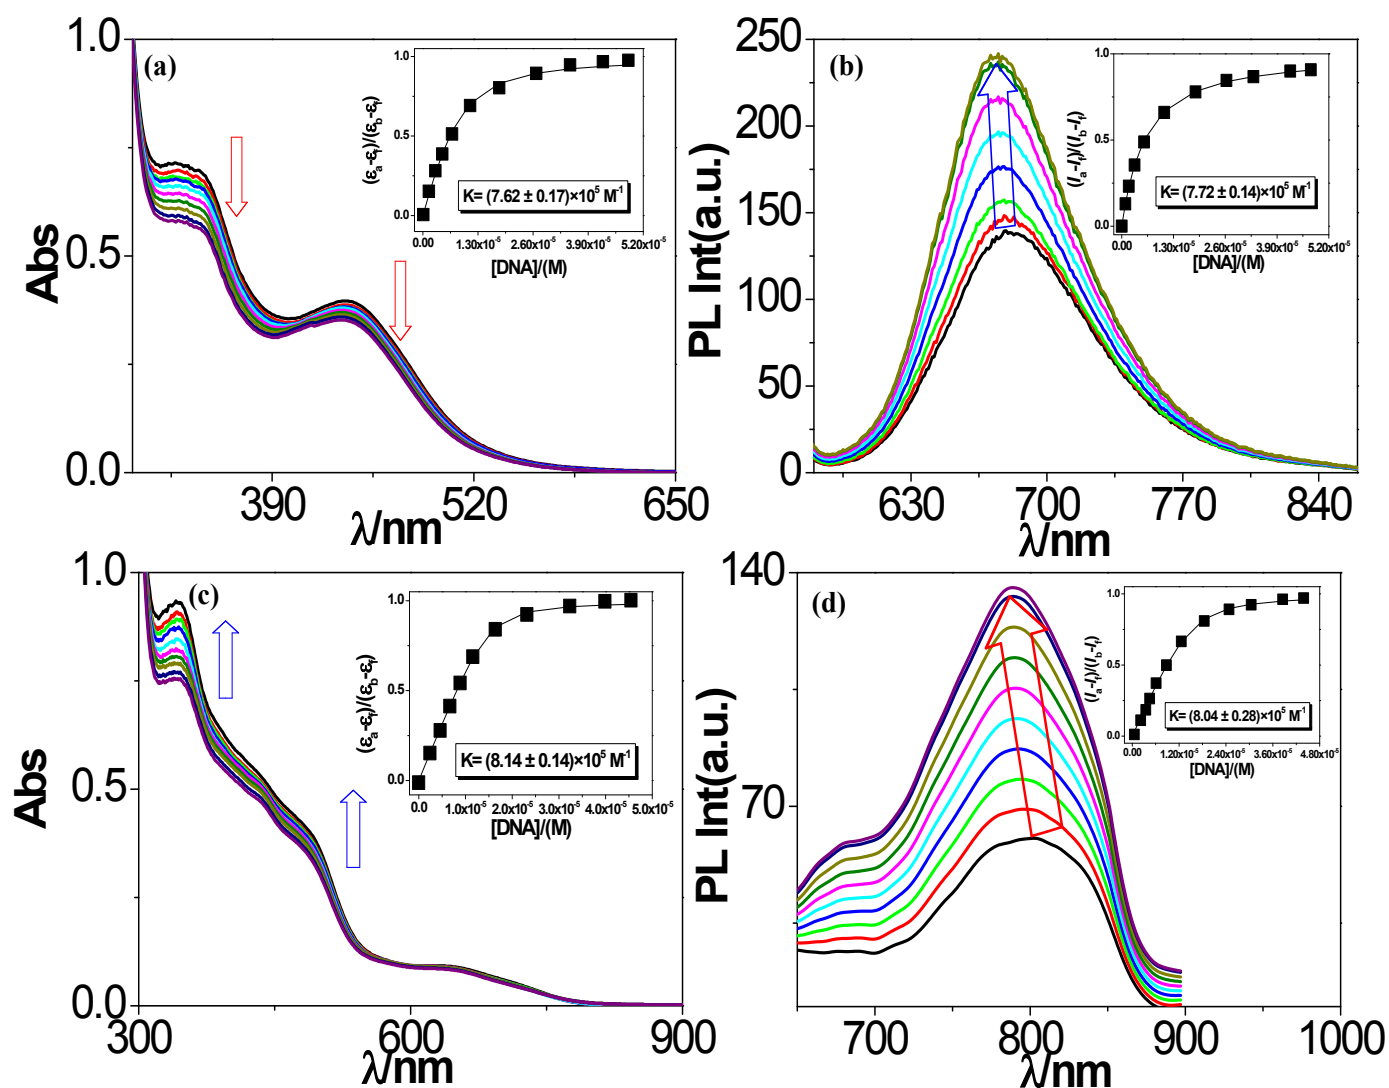

**Fig. S20** Changes in UV-vis absorption (a, c) and luminescence spectra (b, d) of **1** and **2** (20  $\mu$ M) in presence of increasing amount of CT-DNA (0–40  $\mu$ M for **1** and 0–36  $\mu$ M for **2**) in 300 mM NaCl-Tris buffer medium (pH=7.30). Insets show the binding profile with DNA. Excitation wavelength used for acquiring the luminescence spectra is 450 nm for **1** and 480 nm for **2**.

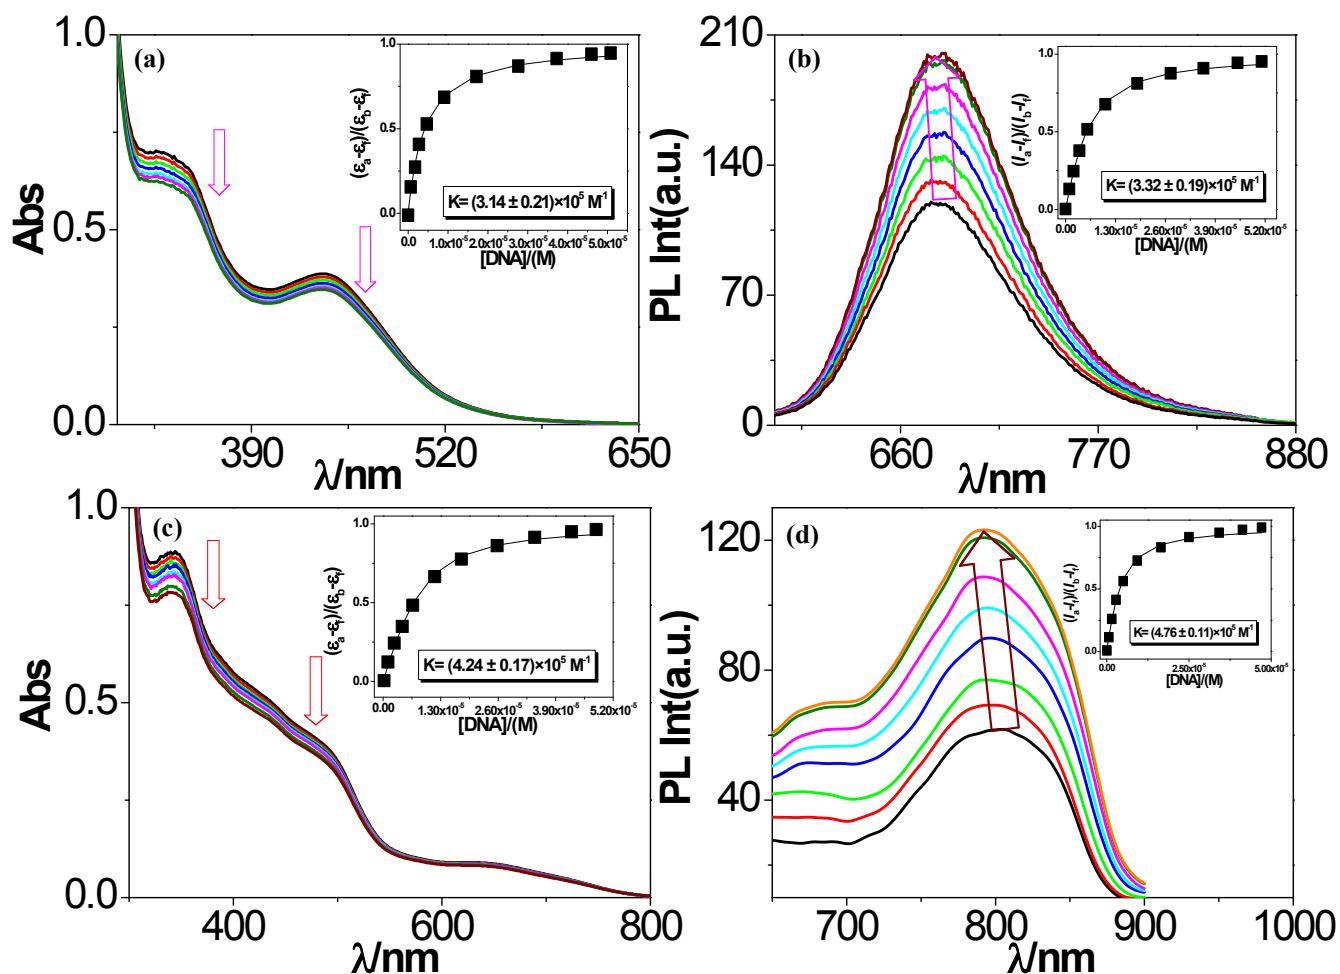

**Fig. S21** Changes in UV-vis absorption (a, c) and luminescence spectra (b, d) of **1** and **2** (20 μM) in presence of increasing amount of CT-DNA (0-45 μM for **1** and 0-40 μM for **2**) in 1M NaCl-Tris buffer medium (pH=7.30). Insets show the binding profile with DNA. Excitation wavelength used for acquiring the luminescence spectra is 450 nm for **1** and 480 nm for **2**.

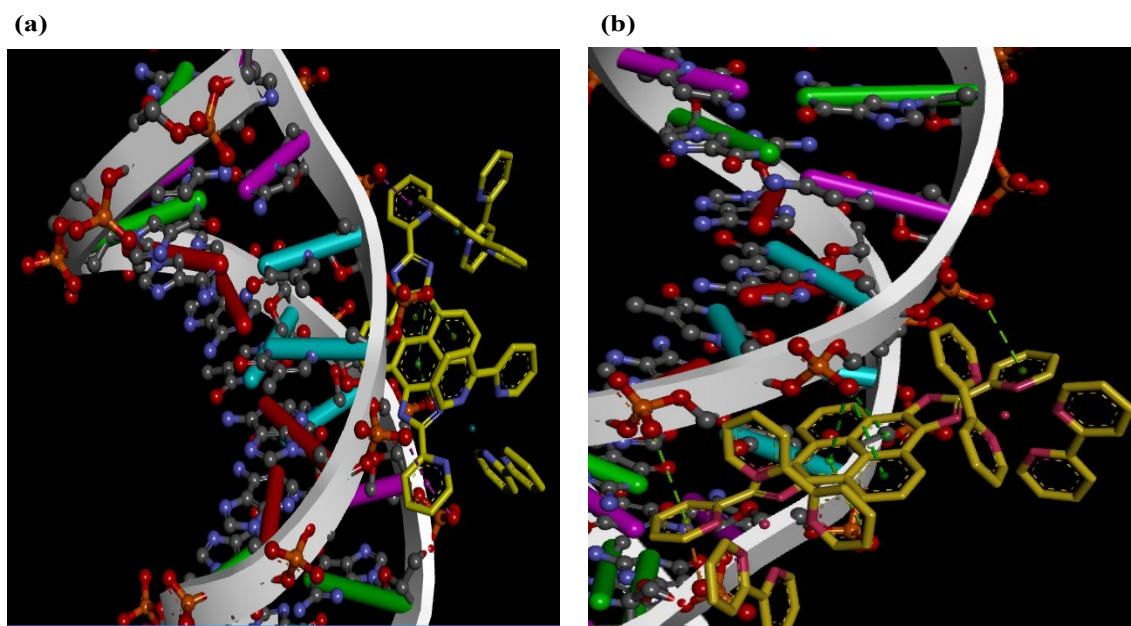

**Fig. S22** Occurrence of anion- $\pi$  interaction between DNA and the complexes; (a) for **1** and (b) for **2**.

## References

- S1 SAINT (version 6.02), SADABS (version 2.03); Bruker AXS Inc.: Madison, WI, 2002.
- S2 SHELXTL, (version 6.10); Bruker AXS Inc.: Madison, WI, 2002.
- S3 G. M. Sheldrick, SHELXL-97, *Program for the Refinement of crystal Structures*; University of Göttingen: Göttingen, Germany, 1997.
- S4 A. L. Spek, Single-crystal structure validation with the program PLATON. *J. Appl. Cryst.* 2003, **36**, 7-13.
- S5 M. J. Frisch, G. W. Trucks, H. B. Schlegel, G. E. Scuseria, M. A. Robb, J. R. Cheeseman, G. Scalmani, V. Barone, B. Mennucci, G. A. Petersson, H. Nakatsuji, M. Caricato, X. Li, H. P. Hratchian, A. F. Izmaylov, J. Bloino, G. Zheng, J. L. Sonnenberg, M. Hada, M. Ehara, K. Toyota, R. Fukuda, J. Hasegawa, M. Ishida, T. Nakajima, Y. Honda, O. Kitao, H. Nakai, T. Vreven, J. A. Jr. Montgomery, J. E. Peralta, F. Ogliaro, M. Bearpark, J. J. Heyd, E. Brothers, K. N. Kudin, V. N. Staroverov, R. Kobayashi, J. Normand, K. A. Rendell, J. C. Burant, S. S. Iyengar, J. Tomasi, M. Cossi, N. Rega, J. M. Millam, M. Klene, J. E. Knox, J. B. Cross, V. Bakken, C. Adamo, J. Jaramillo, R. Gomperts, R. E. Stratmann, O. Yazyev, A. J. Austin, R. Cammi, C. Pomelli, J. W. Ochterski, R. L. Martin, K. Morokuma, V. G. Zakrzewski, G. A. Voth, P. Salvador, J. J. Dannenberg, S. Dapprich, A. D. Daniels, Ö. Farkas, J. B. Foresman, J. V. Ortiz, J. Cioslowski and D. J. Fox, Gaussian 09, revision A.02; Gaussian Inc.: Wallingford, CT, 2009.
- S6 A. D. Becke, *J. Chem. Phys.* 1993, **98**, 5648-5652.
- S7 C. T. Lee, W. T. Yang and R. G. Parr, *Phys. Rev. B* 1988, **37**, 785-789.
- S8 (a) D. Andrae, U. Haeussermann, M. Dolg, H. Stoll and H. Preuss, *Theor. Chim. Acta.* 1990, **77**, 123-141; (b) P. Fuentealba, H. Preuss, H. Stoll and L. V. Szentpaly, *Chem. Phys. Lett.* 1989, **89**, 418-422.
- S9 P. J. Hay and W. R. Wadt, *J. Chem. Phys.* 1985, **82**, 299-310.
- S10 M. E. Casida, C. Jamorski, K. C. Casida and D. R. Salahub, *J. Chem. Phys.* 1998, **108**, 4439-4449.
- S11 R. E. Stratmann, G. E. Scuseria and M. J. Frisch, *J. Chem. Phys.* 1998, **109**, 8218-8224.

- S12 V. A. Walters, C. M. Hadad, Y. Thiel, S. D. Colson, K. B. Wiberg, P. M. Johnson and J. B. Foresman, *J. Am. Chem. Soc.* 1991, **113**, 4782-4791.
- S13 (a) J. Tomasi, B. Mennucci and R. Cammi, *Chem. Rev.* 2005, **105**, 2999-3094. (b) M. Cossi, G. Scalmani, N. Rega and V. Barone, *J. Chem. Phys.* 2002, **117**, 43-54.
- S14 M. Caricato, B. Mennucci, J. Tomasi, F. Ingrosso, R. Cammi, S. Corni and G. Scalmani, *J. Chem. Phys.* 2006, **124**, 124520-124530.
- S15 B. Mennucci, C. Cappelli, C. A. Guido, R. Cammi and J. Tomasi, *J. Phys. Chem. A* 2009, **113**, 3009-3020.
- S16 R. II. Dennington, T. Keith and J. Millam, *Gauss View 3*; Semichem, Inc.: Shawnee Mission, KS, 2007.
- S17 N. M. O Boyle, A. L. Tenderholt, K. M. Langner, *J. Comput. Chem.* **2008**, *29*, 839-845.
- S18 (a) J. D. McGhee and P. H. von Hippel, *J. Mol. Biol.*, 1974, **86**, 469-489; (b) R. B. Nair, E. S. Teng, S. L. Kirkand and C. J. Murphy, *Inorg. Chem.*, 1998, **37**, 139-141; (c) R. B. Naira and C. J. Murphy, *J. Inorg. Biochem.* 1998, **69**, 129-133.
- S19 M. T. Cater, M. Rodriguez and A. J. Bard, *J. Am. Chem. Soc.* 1989, **111**, 8901-8911.
- S20 D. L. Boger, B. E. Fink, S. R. Brunette, W. C. Tse and M. P. Hedrick, *J. Am. Chem. Soc.* 2001, **123**, 5878-5891.
- S21 S. Das, S. Parveena and A. B. Pradhan, *Spectrochimica Acta Part A: Molecular and Biomolecular Spectroscopy*. 2014, **118**, 356-366.
- S22 D. Mustard and D. W. Ritchie, *Proteins: Struct. Funct. Bioinf.* 2005, **60**, 269-274.
- S23 D. V. Partyka, R. J. Staples and R. H. Holm, *Inorg. Chem.*, 2003, **42**, 7877-7886.
